# Supplementary material
Source: publisher figshare collection journal article supplement (https://acs.figshare.com/ndownloader/files/6054366)
Supplement: Supplementary file 1 [file 6054366]

Supporting Information for:

**Mechanistic Insight into the Attachment of Fullerene Derivatives on Crystal Faces of Methyl Ammonium Lead Iodide Based Perovskites**

*M.F.N. Taufique, S.M. Mortuza, and Soumik Banerjee <sup>1</sup>*

School of Mechanical and Materials Engineering  
Washington State University, Pullman, Washington 99164-2920, U.S.A.

**Table S1:** The number of PCBM and CB molecules between the two perovskite surfaces in the simulated systems is provided.

| Model system  | Number of molecules |      |                |
|---------------|---------------------|------|----------------|
|               | PCBM                | CB   | Deposited PCBM |
| (110) surface | 100                 | 5186 | 35             |
| (100) surface | 100                 | 4820 | 27             |

---

<sup>1</sup>Corresponding author, Tel: +1 509 3350294, E-mail: [soumik.banerjee@wsu.edu](mailto:soumik.banerjee@wsu.edu)

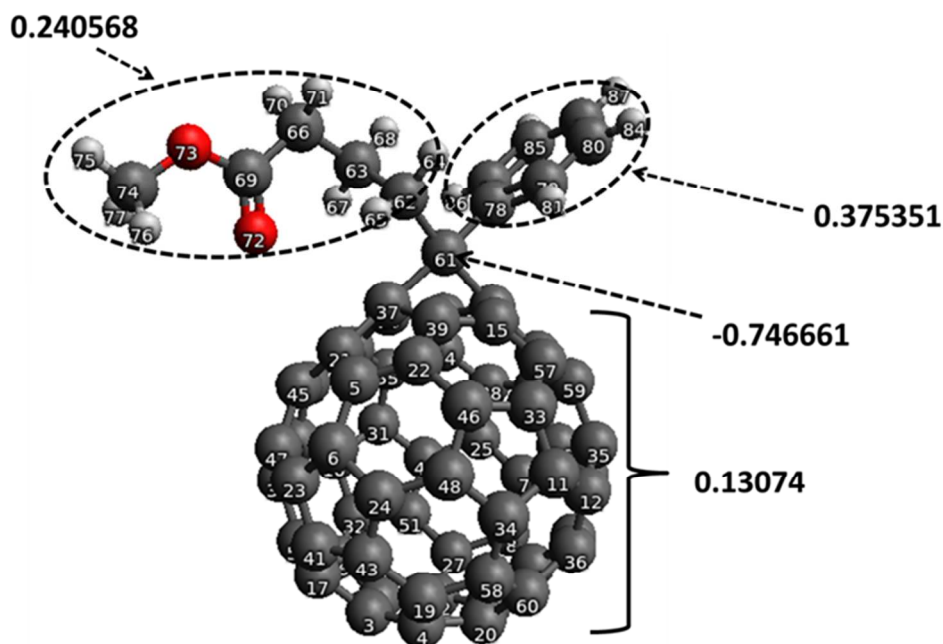

**Figure S1:** Molecular structure of PCBM with specific serial numbers for atoms is presented. For the convenience, the net partial charges of some key atomic groups are highlighted. Dark grey: C atoms; light grey: H atoms; red: O atoms.

**Table S2:** Partial charges of a PCBM in chlorobenzene obtained from density functional theory are shown. The indices of atoms in the first column of the table are consistent with the serial numbers presented in Figure S1.

| Atom | Coordinates |        |        | Charge ( <i>e</i> ) |
|------|-------------|--------|--------|---------------------|
|      | X           | Y      | Z      |                     |
| 1 C  | 0.148       | -0.120 | 0.159  | -0.0309             |
| 2 C  | 0.191       | -0.138 | 0.027  | 0.0512              |
| 3 C  | -0.185      | 0.462  | -0.028 | -0.0226             |
| 4 C  | -0.143      | 0.444  | -0.159 | 0.0032              |
| 5 C  | -0.250      | -0.082 | -0.049 | 0.0983              |
| 6 C  | -0.317      | 0.035  | -0.087 | -0.0664             |
| 7 C  | 0.323       | 0.290  | 0.086  | -0.0291             |

|      |        |        |        |         |
|------|--------|--------|--------|---------|
| 8 C  | 0.256  | 0.406  | 0.049  | 0.0241  |
| 9 C  | -0.161 | 0.169  | 0.315  | 0.0004  |
| 10 C | -0.046 | 0.244  | 0.342  | -0.0009 |
| 11 C | 0.052  | 0.080  | -0.342 | 0.0108  |
| 12 C | 0.166  | 0.155  | -0.315 | -0.0313 |
| 13 C | 0.008  | -0.136 | 0.193  | -0.1014 |
| 14 C | 0.201  | -0.010 | 0.238  | 0.0661  |
| 15 C | 0.094  | -0.172 | -0.076 | 0.0264  |
| 16 C | 0.288  | -0.047 | -0.030 | -0.0141 |
| 17 C | -0.283 | 0.371  | 0.030  | 0.0395  |
| 18 C | -0.089 | 0.497  | 0.076  | -0.0041 |
| 19 C | -0.196 | 0.335  | -0.239 | -0.0385 |
| 20 C | -0.002 | 0.460  | -0.193 | 0.0085  |
| 21 C | -0.215 | -0.104 | 0.090  | 0.0351  |
| 22 C | -0.143 | -0.134 | -0.132 | 0.0233  |
| 23 C | -0.351 | 0.135  | 0.014  | 0.0090  |
| 24 C | -0.279 | 0.104  | -0.208 | -0.0084 |
| 25 C | 0.284  | 0.220  | 0.208  | 0.0233  |
| 26 C | 0.356  | 0.190  | -0.014 | -0.0158 |
| 27 C | 0.148  | 0.458  | 0.131  | -0.0400 |
| 28 C | 0.220  | 0.428  | -0.090 | 0.0056  |
| 29 C | -0.151 | 0.027  | 0.290  | -0.0296 |
| 30 C | -0.263 | 0.223  | 0.227  | 0.0215  |
| 31 C | 0.084  | 0.179  | 0.345  | -0.0013 |
| 32 C | -0.029 | 0.375  | 0.282  | 0.0051  |
| 33 C | 0.034  | -0.051 | -0.282 | 0.0355  |
| 34 C | -0.078 | 0.146  | -0.345 | 0.0149  |
| 35 C | 0.269  | 0.101  | -0.227 | 0.0288  |
| 36 C | 0.156  | 0.298  | -0.290 | -0.0131 |
| 37 C | -0.085 | -0.169 | 0.093  | 0.1090  |
| 38 C | 0.295  | 0.077  | 0.183  | -0.0484 |
| 39 C | -0.040 | -0.188 | -0.044 | 0.1129  |
| 40 C | 0.339  | 0.058  | 0.046  | 0.0448  |
| 41 C | -0.334 | 0.266  | -0.046 | -0.0352 |
| 42 C | 0.046  | 0.512  | 0.043  | 0.0336  |
| 43 C | -0.289 | 0.247  | -0.183 | 0.0452  |
| 44 C | 0.090  | 0.493  | -0.094 | -0.0289 |
| 45 C | -0.247 | -0.008 | 0.186  | -0.0616 |
| 46 C | -0.106 | -0.067 | -0.249 | -0.0503 |
| 47 C | -0.317 | 0.114  | 0.147  | 0.0146  |
| 48 C | -0.176 | 0.055  | -0.288 | -0.0020 |
| 49 C | 0.181  | 0.270  | 0.287  | 0.0024  |
| 50 C | 0.322  | 0.211  | -0.148 | -0.0080 |
| 51 C | 0.112  | 0.391  | 0.248  | 0.0060  |
| 52 C | 0.252  | 0.332  | -0.187 | -0.0029 |
| 53 C | -0.026 | -0.036 | 0.293  | 0.0911  |

|      |        |        |        |         |
|------|--------|--------|--------|---------|
| 54 C | -0.247 | 0.349  | 0.169  | -0.0393 |
| 55 C | 0.093  | 0.041  | 0.321  | -0.0676 |
| 56 C | -0.127 | 0.427  | 0.197  | 0.0023  |
| 57 C | 0.132  | -0.103 | -0.198 | -0.0747 |
| 58 C | -0.088 | 0.283  | -0.322 | -0.0236 |
| 59 C | 0.252  | -0.025 | -0.170 | -0.0102 |
| 60 C | 0.032  | 0.360  | -0.293 | 0.0384  |
| 61 C | 0.102  | -0.509 | 0.081  | -0.7466 |
| 62 C | -0.025 | -0.579 | 0.051  | 0.5973  |
| 63 C | -0.134 | -0.558 | 0.159  | 0.0202  |
| 64 H | -0.020 | -0.686 | 0.023  | -0.1422 |
| 65 H | -0.059 | -0.525 | -0.040 | -0.0378 |
| 66 C | -0.271 | -0.612 | 0.119  | -0.2628 |
| 67 H | -0.140 | -0.451 | 0.180  | -0.0540 |
| 68 H | -0.102 | -0.607 | 0.251  | 0.0216  |
| 69 C | -0.336 | -0.535 | 0.005  | 0.7985  |
| 70 H | -0.341 | -0.608 | 0.204  | 0.0779  |
| 71 H | -0.267 | -0.718 | 0.090  | 0.0371  |
| 72 O | -0.295 | -0.432 | -0.044 | -0.6167 |
| 73 O | -0.450 | -0.596 | -0.035 | -0.4632 |
| 74 C | -0.522 | -0.529 | -0.141 | 0.3314  |
| 75 H | -0.609 | -0.591 | -0.160 | -0.0218 |
| 76 H | -0.459 | -0.522 | -0.230 | -0.0170 |
| 77 H | -0.552 | -0.429 | -0.109 | -0.0278 |
| 78 C | 0.223  | -0.566 | 0.024  | 0.6475  |
| 79 C | 0.232  | -0.665 | -0.077 | -0.3628 |
| 80 C | 0.354  | -0.708 | -0.125 | -0.0130 |
| 81 H | 0.140  | -0.707 | -0.118 | 0.1510  |
| 82 C | 0.345  | -0.513 | 0.075  | -0.2839 |
| 83 C | 0.473  | -0.656 | -0.070 | -0.1299 |
| 84 H | 0.359  | -0.782 | -0.204 | 0.0850  |
| 85 C | 0.468  | -0.560 | 0.031  | -0.0113 |
| 86 H | 0.337  | -0.435 | 0.150  | 0.1163  |
| 87 H | 0.569  | -0.691 | -0.107 | 0.0998  |
| 88 H | 0.560  | -0.520 | 0.072  | 0.0766  |

### *Estimation of $\Delta G$ values*

In our simulated systems, both surfaces have positively charged atoms, such as Pb in case of (110) surface and H for (100) surface, which directly associate with the carbonyl oxygen atom of PCBM due to strong electrostatic interactions. On the other hand, for the same reason, the corresponding energy barriers for desorption of PCBM from the perovskite surfaces and diffusion along the surfaces are extremely high. As a result, only the energy barrier for deposition of PCBM from solution to substrate plays a significant role in the overall growth of monolayer of PCBM on the perovskite surface. Applying the above assumptions to classical heterogeneous nucleation theory, the rate of cluster deposition ( $N_D$ ) is given as,<sup>1-3</sup>

$$N_D = R^\alpha e^{\frac{(-\Delta G)}{k_b T_s}} \quad (1S)$$

where,  $R$  is the rate of attempts (particle/ns) for deposition of PCBM on the perovskite surface and  $\alpha$  is a constant related to the theoretical cluster size, which is considered as 1 in the present study. Here,  $k_b$  is the Boltzmann's constant,  $T_s$  is the substrate temperature that is 400K for the simulated systems and  $\Delta G$  is the thermodynamic barrier for deposition of individuals PCBM from solution to perovskite surface. We estimated  $\Delta G$  values for both surfaces, for the sake of qualitative comparison, by using the ratio of  $N_D$  and  $R$  directly obtained from the MD simulations, and presented in Table S3. Ultimately, the nearly identical estimates of  $\Delta G$  for both systems signify that the extent of deposition of PCBM on different perovskite surfaces is not distinct energetically. However, the deposition is dependent on kinetics of each system based on processing conditions. Since the temperature and concentration in the simulated surfaces were identical, our model systems have similar kinetics resulting in very similar success to attempt ratios, shown in Table S3, for deposition.

**Table S3:** Estimated values of  $\Delta G$ , in terms of total number of deposited PCBM and total number of attempts for deposition, are presented for both perovskite surfaces.

| Model system | $N_D/R$               | $\Delta G$ (eV) |
|--------------|-----------------------|-----------------|
| (110) plane  | $7.66 \times 10^{-3}$ | 0.167           |
| (100) plane  | $7.12 \times 10^{-3}$ | 0.170           |

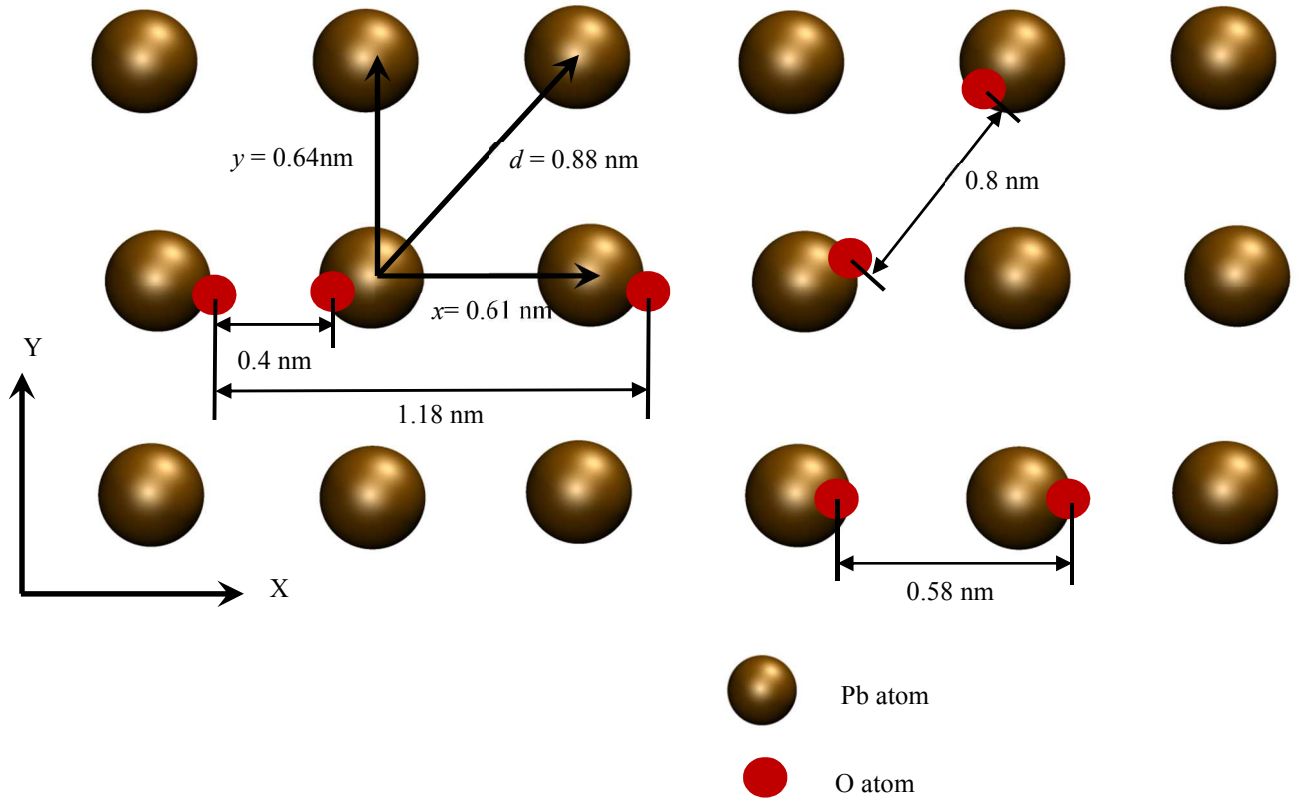

**Figure S2:** Inter-atomic arrangements of Pb and O atoms in the  $x$ - $y$  plane of (110) perovskite crystal face are shown. Here,  $x$ ,  $y$  and  $d$  represents the distance between Pb atoms, which are along  $x$ -axis,  $y$ -axis and diagonal-direction, respectively. The corresponding radius of Pb and O atoms are not in actual scale.

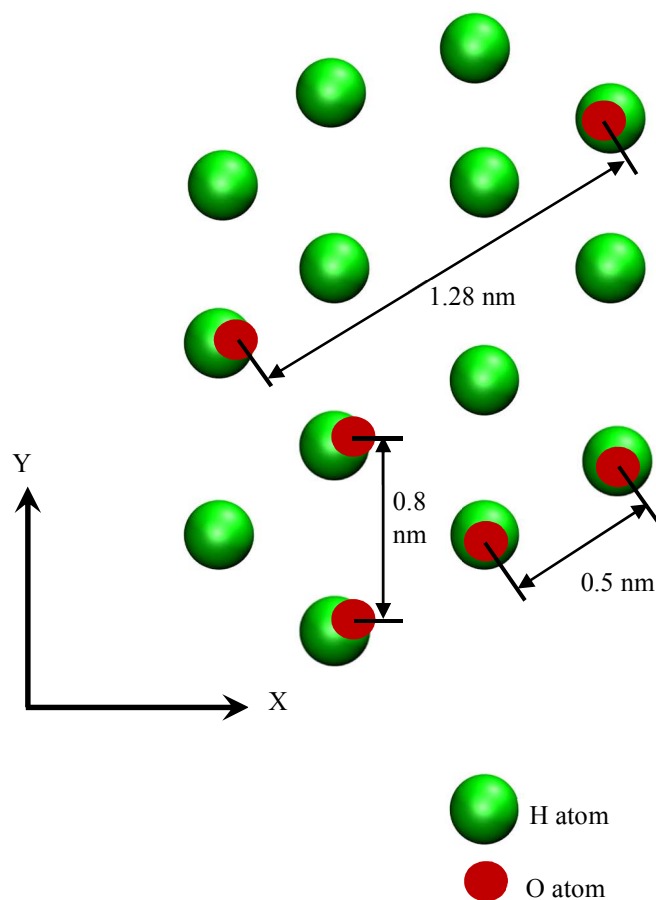

**Figure S3:** Inter-atomic arrangements of H and O atoms in the x-y plane of (100) perovskite crystal face are shown. The corresponding radius of H and O atoms are not in actual scale.

### Supplementary references

1. Markov, I. V., *Crystal Growth for Beginners: Fundamentals of Nucleation, Crystal Growth and Epitaxy*. 2nd ed.; World Scientific: New Jersey, USA, 2003.
2. Ohring, M., *Material Science of Thin Films*. 2nd ed.; Academic Press: Orlando, USA, 2001.
3. Gupta, V. K.; Abbott, N. L., Using droplets of nematic liquid crystal to probe the microscopic and mesoscopic structure of organic surfaces. *Langmuir* **1999**, *15* (21), 7213-7223.
